# Supplementary material for: Characteristic differences between the promoters of intron-containing and intronless ribosomal protein genes in yeast
Source: PubMed Central journal article supplement (PMC2585575; doi:10.1186/1756-0500-1-109), 2008-10-29

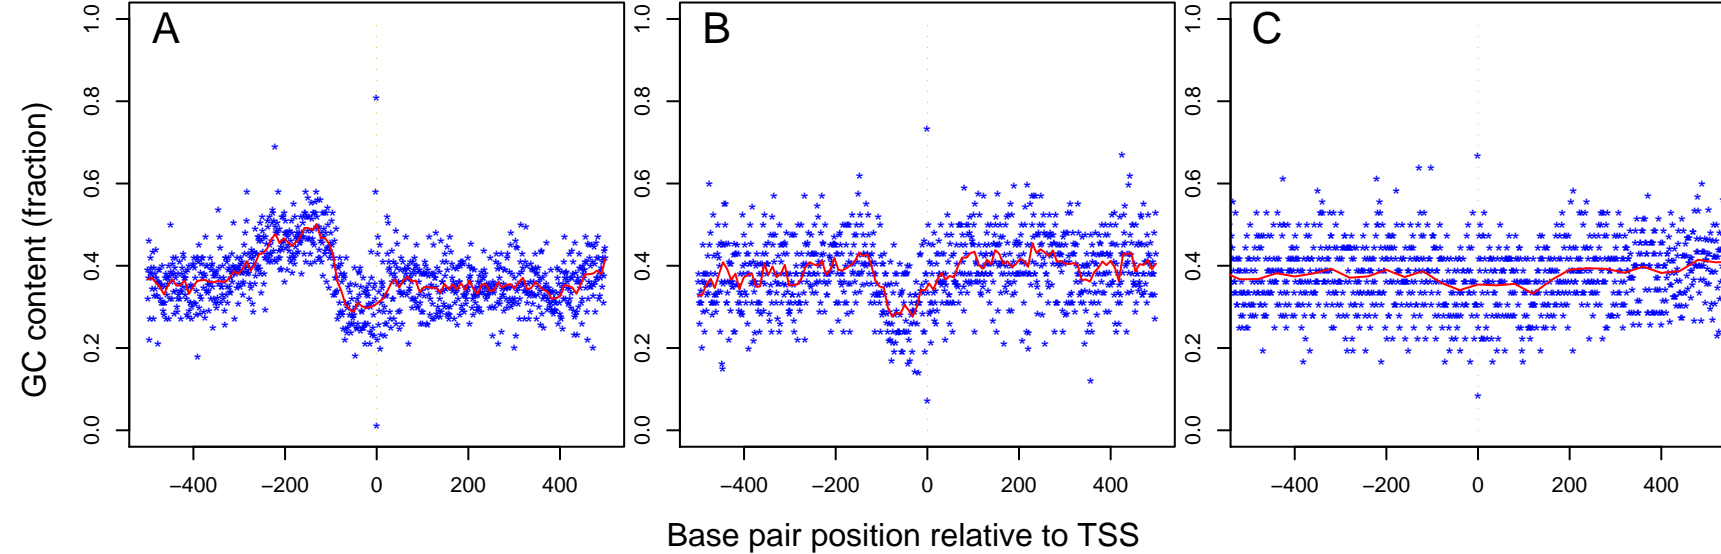

Supplement: 1756-0500-1-109-S8.pdf [file 1756-0500-1-109-S8.pdf]
